# Supplementary material for: Can Soil Improvers (Biochar, Compost, Insect Frass, Lime, and Zeolite) Achieve Phytostabilization of Potentially Toxic Elements in Heavily Contaminated Soil with the Use of Purslane (Portulaca oleracea)?
Source: MDPI journal article supplement (doi:10.3390/agronomy13112827), 2023-11-16
Supplement: s1 [file s1]

## Supplementary material for the paper

### Can Soil Improvers (Biochar, Compost, Insect Frass, Lime, and Zeolite) Achieve Phytostabilization of Potentially Toxic Elements in a Heavily Contaminated Soil with the Use of Purslane (*Portulaca oleracea*)?

Georgios Thalassinos, Efi Levizou, and Vasileios Antoniadis\*

Department of Agriculture Crop Production and Rural Environment, University of Thessaly, GR-384 46 Volos, Greece; thalassinosgeorgios@hotmail.com (G.T.); elevizou@uth.gr (E.L.)

\* Correspondence: antoniadis@uth.gr

**Table S1.** Characteristics of biochar.

|                                             |      |                                            |        |
|---------------------------------------------|------|--------------------------------------------|--------|
| <b>Yield (%)</b>                            | 22   | <b>C (%w/w)</b>                            | 77.97% |
| <b>pH</b>                                   | 8.28 | <b>H (%w/w)</b>                            | 2.61   |
| <b>EC (μS/cm)</b>                           | 250  | <b>N (%w/w)</b>                            | 0.88   |
| <b>Bulk density (g/mL)</b>                  | 0.3  | <b>O (%w/w)</b>                            | 12.21  |
| <b>Ash (%w/w)</b>                           | 5.8  | <b>Ca (%w/w)</b>                           | 4.3    |
| <b>Total pore volume (cm<sup>3</sup>/g)</b> | 0.14 | <b>Micropore volume (cm<sup>3</sup>/g)</b> | 0.11   |
|                                             |      | <b>Mesopore volume (cm<sup>3</sup>/g)</b>  | 0.02   |

**Table S2.** Characteristics of compost.

|                               |                   |                         |    |
|-------------------------------|-------------------|-------------------------|----|
| <b>pH</b>                     | 7.1               | <b>N (%)</b>            | 2  |
| <b>EC (μS/cm)</b>             | 1650              | <b>P (%)</b>            | 1  |
| <b>Organic matter (%)</b>     | 65                | <b>K (%)</b>            | 1  |
| <b>Microorganisms (CFU/g)</b> | 3*10 <sup>6</sup> | <b>Humic acids (%)</b>  | 14 |
|                               |                   | <b>Fulvic acids (%)</b> | 4  |

**Table S3.** Characteristics of frass.

|                           |         |              |      |
|---------------------------|---------|--------------|------|
| <b>pH</b>                 | (5.8-6) | <b>N (%)</b> | 4.16 |
| <b>EC (μS/cm)</b>         | (5300)  | <b>P (%)</b> | 1.02 |
| <b>Organic matter (%)</b> | 89.4    | <b>K (%)</b> | 2.05 |
